# Supplementary material for: Application of a Metal Cobalt Based on 4,6-Bis(imidazol-1-yl)isophthalicacid Metal-Organic -Framework Materials in Photocatalytic CO2 Reduction, Antibacterial, and Dye Adsorption
Source: MDPI journal article supplement (doi:10.3390/polym15183848), 2023-09-21
Supplement: s1 [file s1]

# Application of a metal cobalt based on 4,6-bis(imidazol-1-yl)isophthalic acid metal-organic framework materials in photocatalytic CO<sub>2</sub> reduction, antibacterial and dye adsorption

Yue Han, Lun Zhao\*, ZiyunWang, JiayuLi, Hongwei Jing, Guanying Song, Yi Yang

College of Chemistry, Changchun Normal University, Changchun, 130032, Jilin, P. R. China;

\*Correspondence: E-mail: zhaolun@ccsfu.edu.cn; Tel.: +86-431-86168903(L Zhao)

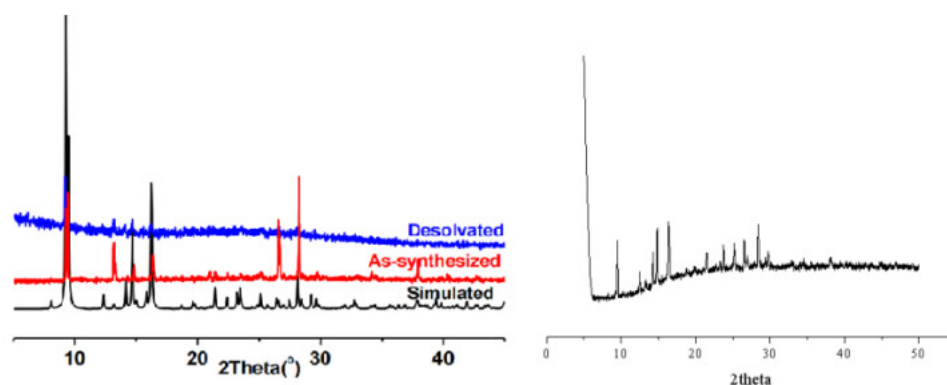

Figure S1. XRD patterns of the MOF (the left is the MOF XRD in the literature; the right is the MOF XRD synthesized in this paper)

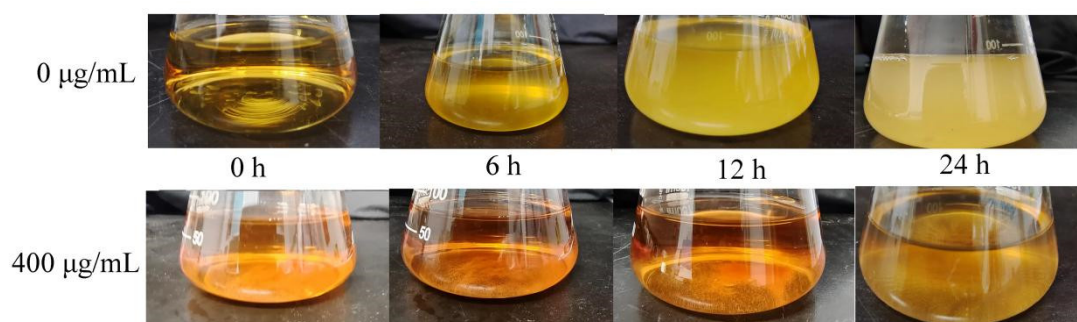

Figure S2. Changes of MOF solution with different concentration on S.aureus in 24 h.

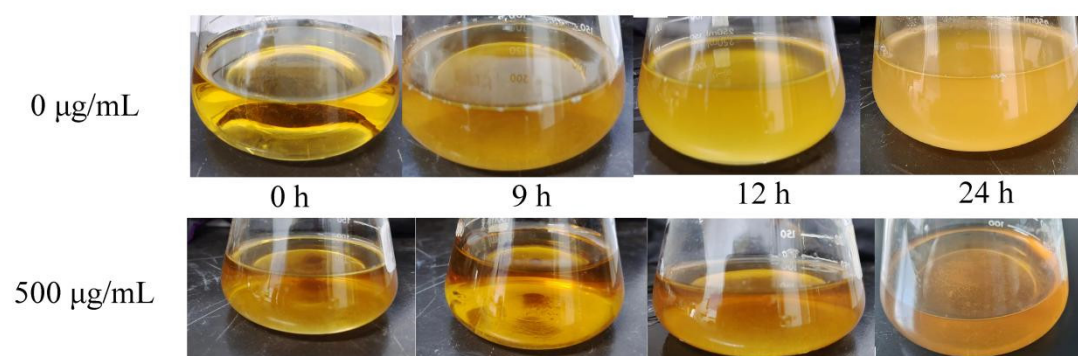

Figure S3. Changes of MOF solution with different concentration on *C. albicans* in 24 h.

Table S1. Comparison of production rate of photocatalytic CO<sub>2</sub> reduction products under similar conditions

| Catalytic agent                                   | Main products | Productivity                                                           | Productivity /( $\mu\text{mol/g}$ ) | TON  | Ref.                                                                                                                                                                                                         |
|---------------------------------------------------|---------------|------------------------------------------------------------------------|-------------------------------------|------|--------------------------------------------------------------------------------------------------------------------------------------------------------------------------------------------------------------|
| ZIF-67@a-TiO <sub>2</sub>                         | CO            | 43.8 $\mu\text{mol}$                                                   | 43800                               | 9.73 | Multi-functional amorphous TiO <sub>2</sub> layer on ZIF-67 for enhanced CO <sub>2</sub> photoreduction performances under visible light. Journal of CO <sub>2</sub> Utilization. <b>2019</b> , 34, 411-421. |
| ZIF-67_3                                          | CO            | 3.89 $\mu\text{mol}\cdot\text{mg}^{-1}\cdot\text{h}^{-1}$              | 15560                               | 3.5  | Metal-organic framework (ZIF-67) as efficient cocatalyst for photocatalytic reduction of CO <sub>2</sub> : the role of morphology effect. J. Mater. Chem. A, <b>2018</b> , 6, 4768-4775.                     |
| Ag@Co-ZIF-9                                       | CO            | 28.4 $\mu\text{mol}$                                                   | 28400                               | -    | Photo-reduction of carbon dioxide by ultra-small Ag nanoparticles doped Co-ZIF-9 under visible light. Nanotechnology. <b>2018</b> , 29, 284003.                                                              |
| MOF-525-Co                                        | CO            | 200.6 $\mu\text{mol}\cdot\text{g}^{-1}\cdot\text{h}^{-1}$              | 1203.6                              | -    | Efficient Visible-Light-Driven Carbon Dioxide Reduction by a Single-Atom Implanted Metal–Organic Framework. Angew. Chem. Int. Ed. <b>2021</b> , 762, 144101.                                                 |
| TPVT-MOFs@g-C <sub>3</sub> N <sub>4</sub>         | CO            | 56.4 $\mu\text{mol}\cdot\text{g}^{-1}\cdot\text{h}^{-1}$               | 112.8                               | -    | Metal–organic framework (MOF) composite materials for photocatalytic CO <sub>2</sub> reduction under visible light. Dalton Trans. <b>2021</b> , 50, 3186-3192.                                               |
| Ni <sub>3</sub> (HITP) <sub>2</sub>               | CO            | 3.45 $\times 10^4$ $\mu\text{mol}\cdot\text{g}^{-1}\cdot\text{h}^{-1}$ | 103500                              | -    | Selective reduction of CO <sub>2</sub> by conductive MOF nanosheets as an efficient co-catalyst under visible light illumination. Applied Catalysis B: Environmental. <b>2018</b> , 238, 339-345.            |
| g-C <sub>3</sub> N <sub>4</sub> -MOLs             | CO            | 464.1 $\mu\text{mol}\cdot\text{g}^{-1}\cdot\text{h}^{-1}$              | 4641                                | -    | Metal-organic layers as a platform for developing single-atom catalysts for photochemical CO <sub>2</sub> reduction. Nano Energy. <b>2021</b> , 80, 105542.                                                  |
| [( $\mu$ -bdt)Fe <sub>2</sub> (CO) <sub>6</sub> ] | CO            | -                                                                      | -                                   | 710  | Selective photocatalytic reduction of CO <sub>2</sub> to CO mediated by a [FeFe]-hydrogenase model with a 1,2-phenylene S-to-S bridge. Chinese Journal of Catalysis. <b>2021</b> , 42, 310-319.              |

|     |    |                |          |       |                                                                                                                                                                                      |
|-----|----|----------------|----------|-------|--------------------------------------------------------------------------------------------------------------------------------------------------------------------------------------|
| CAT | CO | -              | -        | 140   | Selective and Efficient Photocatalytic CO <sub>2</sub> Reduction to CO Using Visible Light and an Iron-Based Homogeneous Catalyst. J. Am. Chem. Soc. <b>2014</b> , 136, 16768–16771. |
| MOF | CO | 410.59<br>μmol | 41059.03 | 68.66 | This work                                                                                                                                                                            |
